# Supplementary material for: Infant circulating MicroRNAs as biomarkers of effect in fetal alcohol spectrum disorders
Source: PubMed Central journal article supplement (PMC7809131; doi:10.1038/s41598-020-80734-y), 2021-01-14

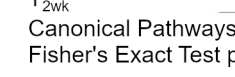

T<sub>2wk</sub>  
 Canonical Pathways  
 Fisher's Exact Test p < 0.05

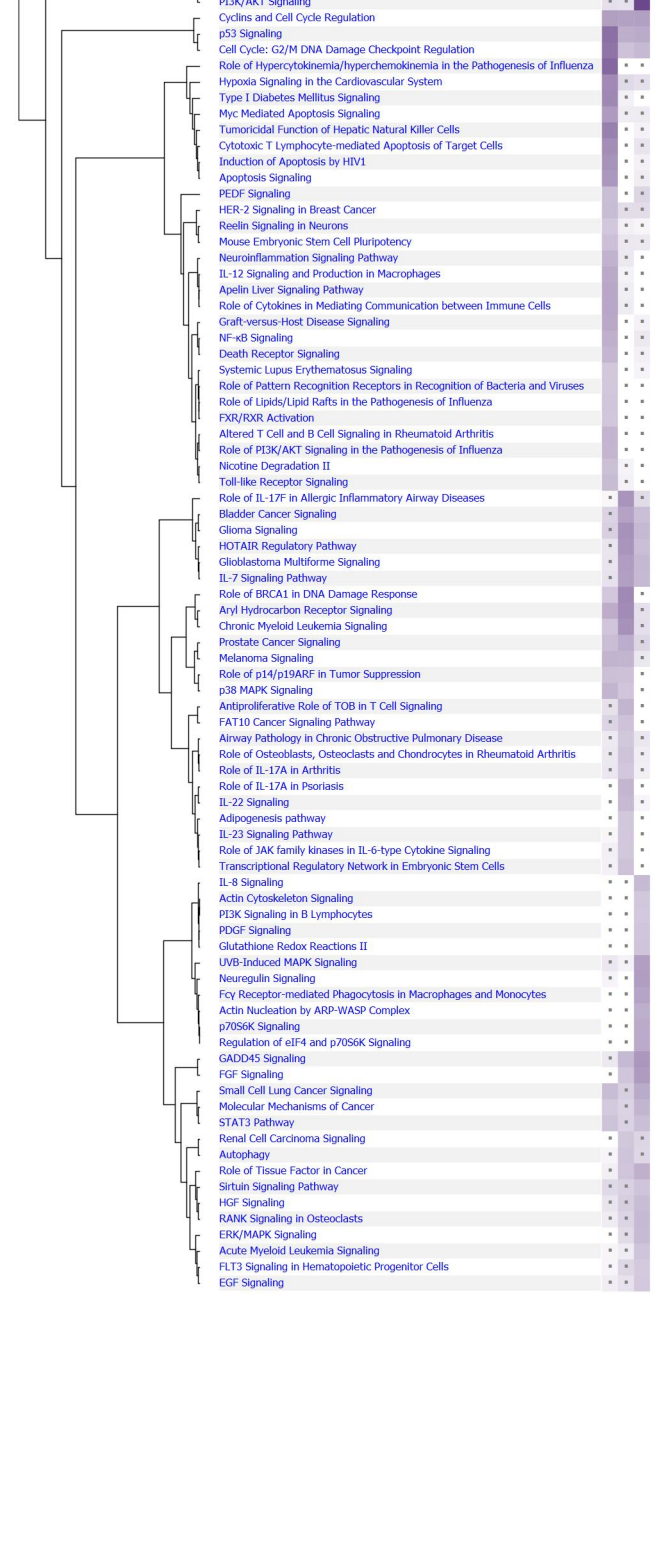

Canonical Pathways

| Pathway                                                                      | t0_t2 | t0_t3 | t0_t1 |
|------------------------------------------------------------------------------|-------|-------|-------|
| Cell Cycle Regulation by BTG Family Proteins                                 | *     | *     | *     |
| Cell Cycle: G1/S Checkpoint Regulation                                       | *     | *     | *     |
| Estrogen-mediated S-phase Entry                                              | *     | *     | *     |
| Pancreatic Adenocarcinoma Signaling                                          | *     | *     | *     |
| PTEN Signaling                                                               | *     | *     | *     |
| Clathrin-mediated Endocytosis Signaling                                      | *     | *     | *     |
| PI3K/AKT Signaling                                                           | *     | *     | *     |
| Cyclins and Cell Cycle Regulation                                            | *     | *     | *     |
| p53 Signaling                                                                | *     | *     | *     |
| Cell Cycle: G2/M DNA Damage Checkpoint Regulation                            | *     | *     | *     |
| Role of Hypercytokinemia/hyperchemokineemia in the Pathogenesis of Influenza | *     | *     | *     |
| Hypoxia Signaling in the Cardiovascular System                               | *     | *     | *     |
| Type I Diabetes Mellitus Signaling                                           | *     | *     | *     |
| Myc Mediated Apoptosis Signaling                                             | *     | *     | *     |
| Tumoricidal Function of Hepatic Natural Killer Cells                         | *     | *     | *     |
| Cytotoxic T Lymphocyte-mediated Apoptosis of Target Cells                    | *     | *     | *     |
| Induction of Apoptosis by HIV1                                               | *     | *     | *     |
| Apoptosis Signaling                                                          | *     | *     | *     |
| PEDF Signaling                                                               | *     | *     | *     |
| HER-2 Signaling in Breast Cancer                                             | *     | *     | *     |
| Reelin Signaling in Neurons                                                  | *     | *     | *     |
| Mouse Embryonic Stem Cell Pluripotency                                       | *     | *     | *     |
| Neuroinflammation Signaling Pathway                                          | *     | *     | *     |
| IL-12 Signaling and Production in Macrophages                                | *     | *     | *     |
| Apelin Liver Signaling Pathway                                               | *     | *     | *     |
| Role of Cytokines in Mediating Communication between Immune Cells            | *     | *     | *     |
| Graft-versus-Host Disease Signaling                                          | *     | *     | *     |
| NF-κB Signaling                                                              | *     | *     | *     |
| Death Receptor Signaling                                                     | *     | *     | *     |
| Systemic Lupus Erythematosus Signaling                                       | *     | *     | *     |
| Role of Pattern Recognition Receptors in Recognition of Bacteria and Viruses | *     | *     | *     |
| Role of Lipids/Lipid Rafts in the Pathogenesis of Influenza                  | *     | *     | *     |
| FXR/RXR Activation                                                           | *     | *     | *     |
| Altered T Cell and B Cell Signaling in Rheumatoid Arthritis                  | *     | *     | *     |
| Role of PI3K/AKT Signaling in the Pathogenesis of Influenza                  | *     | *     | *     |
| Nicotine Degradation II                                                      | *     | *     | *     |
| Toll-like Receptor Signaling                                                 | *     | *     | *     |
| Role of IL-17F in Allergic Inflammatory Airway Diseases                      | *     | *     | *     |
| Bladder Cancer Signaling                                                     | *     | *     | *     |
| Glioma Signaling                                                             | *     | *     | *     |
| HOTAIR Regulatory Pathway                                                    | *     | *     | *     |
| Glioblastoma Multiforme Signaling                                            | *     | *     | *     |
| IL-7 Signaling Pathway                                                       | *     | *     | *     |
| Role of BRCA1 in DNA Damage Response                                         | *     | *     | *     |
| Aryl Hydrocarbon Receptor Signaling                                          | *     | *     | *     |
| Chronic Myeloid Leukemia Signaling                                           | *     | *     | *     |
| Prostate Cancer Signaling                                                    | *     | *     | *     |
| Melanoma Signaling                                                           | *     | *     | *     |
| Role of p14/p19ARF in Tumor Suppression                                      | *     | *     | *     |
| p38 MAPK Signaling                                                           | *     | *     | *     |
| Antiproliferative Role of TOB in T Cell Signaling                            | *     | *     | *     |
| FAT10 Cancer Signaling Pathway                                               | *     | *     | *     |
| Airway Pathology in Chronic Obstructive Pulmonary Disease                    | *     | *     | *     |
| Role of Osteoblasts, Osteoclasts and Chondrocytes in Rheumatoid Arthritis    | *     | *     | *     |
| Role of IL-17A in Arthritis                                                  | *     | *     | *     |
| Role of IL-17A in Psoriasis                                                  | *     | *     | *     |
| IL-22 Signaling                                                              | *     | *     | *     |
| Adipogenesis pathway                                                         | *     | *     | *     |
| IL-23 Signaling Pathway                                                      | *     | *     | *     |
| Role of JAK family kinases in IL-6-type Cytokine Signaling                   | *     | *     | *     |
| Transcriptional Regulatory Network in Embryonic Stem Cells                   | *     | *     | *     |
| IL-8 Signaling                                                               | *     | *     | *     |
| Actin Cytoskeleton Signaling                                                 | *     | *     | *     |
| PI3K Signaling in B Lymphocytes                                              | *     | *     | *     |
| PDGF Signaling                                                               | *     | *     | *     |
| Glutathione Redox Reactions II                                               | *     | *     | *     |
| UVB-Induced MAPK Signaling                                                   | *     | *     | *     |
| Neuregulin Signaling                                                         | *     | *     | *     |
| Fcy Receptor-mediated Phagocytosis in Macrophages and Monocytes              | *     | *     | *     |
| Actin Nucleation by ARP-WASP Complex                                         | *     | *     | *     |
| p70S6K Signaling                                                             | *     | *     | *     |
| Regulation of eIF4 and p70S6K Signaling                                      | *     | *     | *     |
| GADD45 Signaling                                                             | *     | *     | *     |
| FGF Signaling                                                                | *     | *     | *     |
| Small Cell Lung Cancer Signaling                                             | *     | *     | *     |
| Molecular Mechanisms of Cancer                                               | *     | *     | *     |
| STAT3 Pathway                                                                | *     | *     | *     |
| Renal Cell Carcinoma Signaling                                               | *     | *     | *     |
| Autophagy                                                                    | *     | *     | *     |
| Role of Tissue Factor in Cancer                                              | *     | *     | *     |
| Sirtuin Signaling Pathway                                                    | *     | *     | *     |
| HGF Signaling                                                                | *     | *     | *     |
| RANK Signaling in Osteoclasts                                                | *     | *     | *     |
| ERK/MAPK Signaling                                                           | *     | *     | *     |
| Acute Myeloid Leukemia Signaling                                             | *     | *     | *     |
| FLT3 Signaling in Hematopoietic Progenitor Cells                             | *     | *     | *     |
| EGF Signaling                                                                | *     | *     | *     |

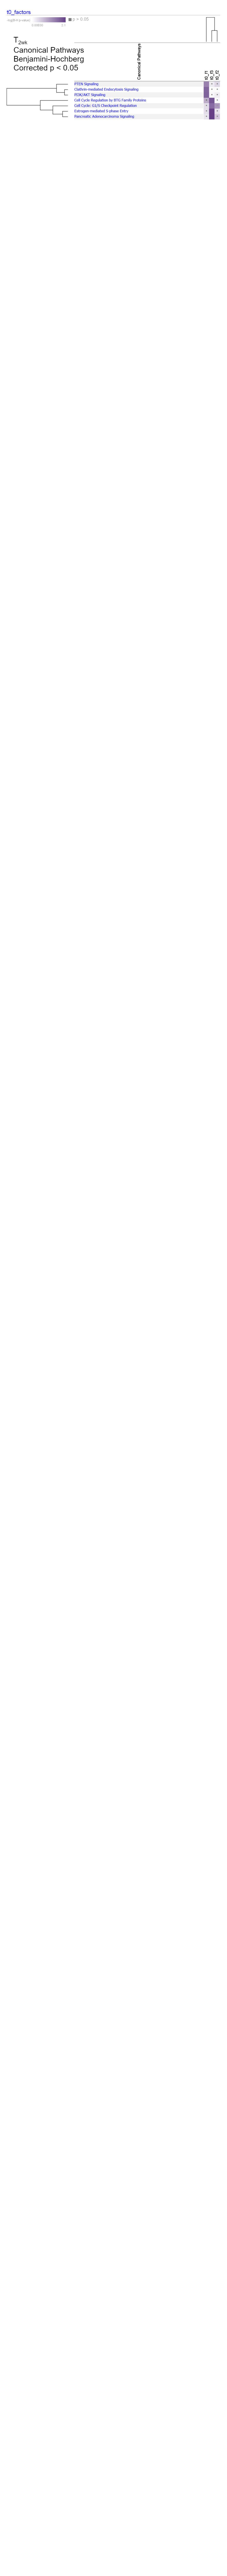

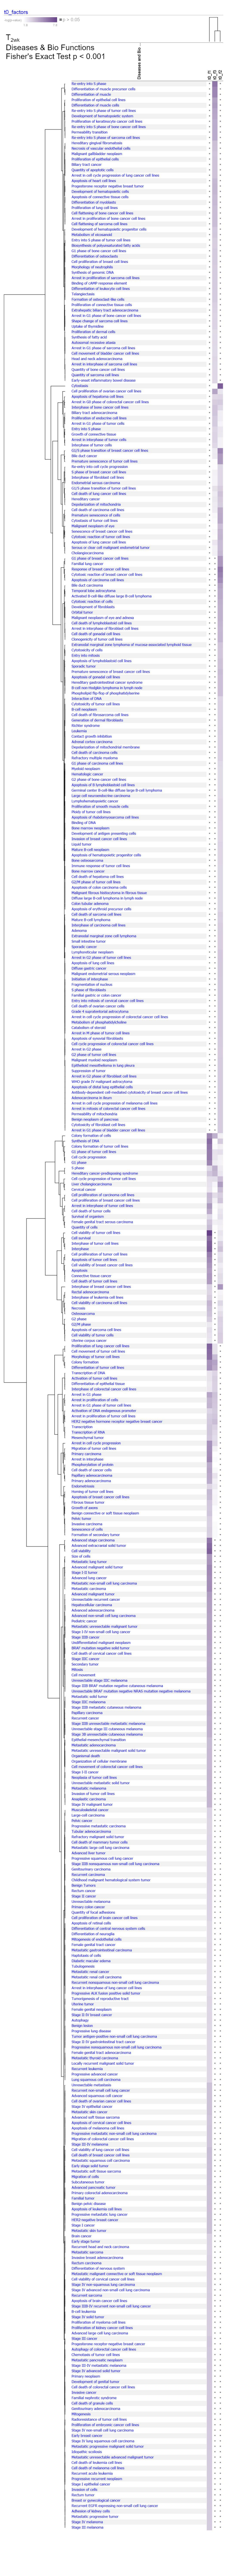

T<sub>2</sub>wk

Diseases & Bio Functions  
 Bejamini-Hochberg  
 Corrected p < 0.05

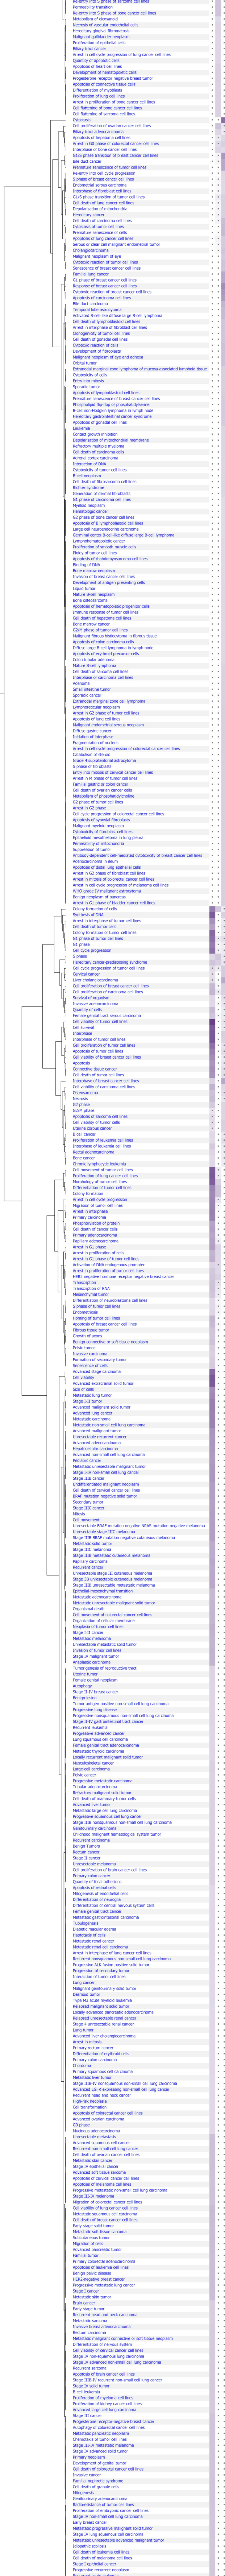

Supplement: 41598_2020_80734_MOESM5_ESM.pdf [file 41598_2020_80734_MOESM5_ESM.pdf]
