# Supplementary material for: Infant circulating MicroRNAs as biomarkers of effect in fetal alcohol spectrum disorders
Source: PubMed Central journal article supplement (PMC7809131; doi:10.1038/s41598-020-80734-y), 2021-01-14

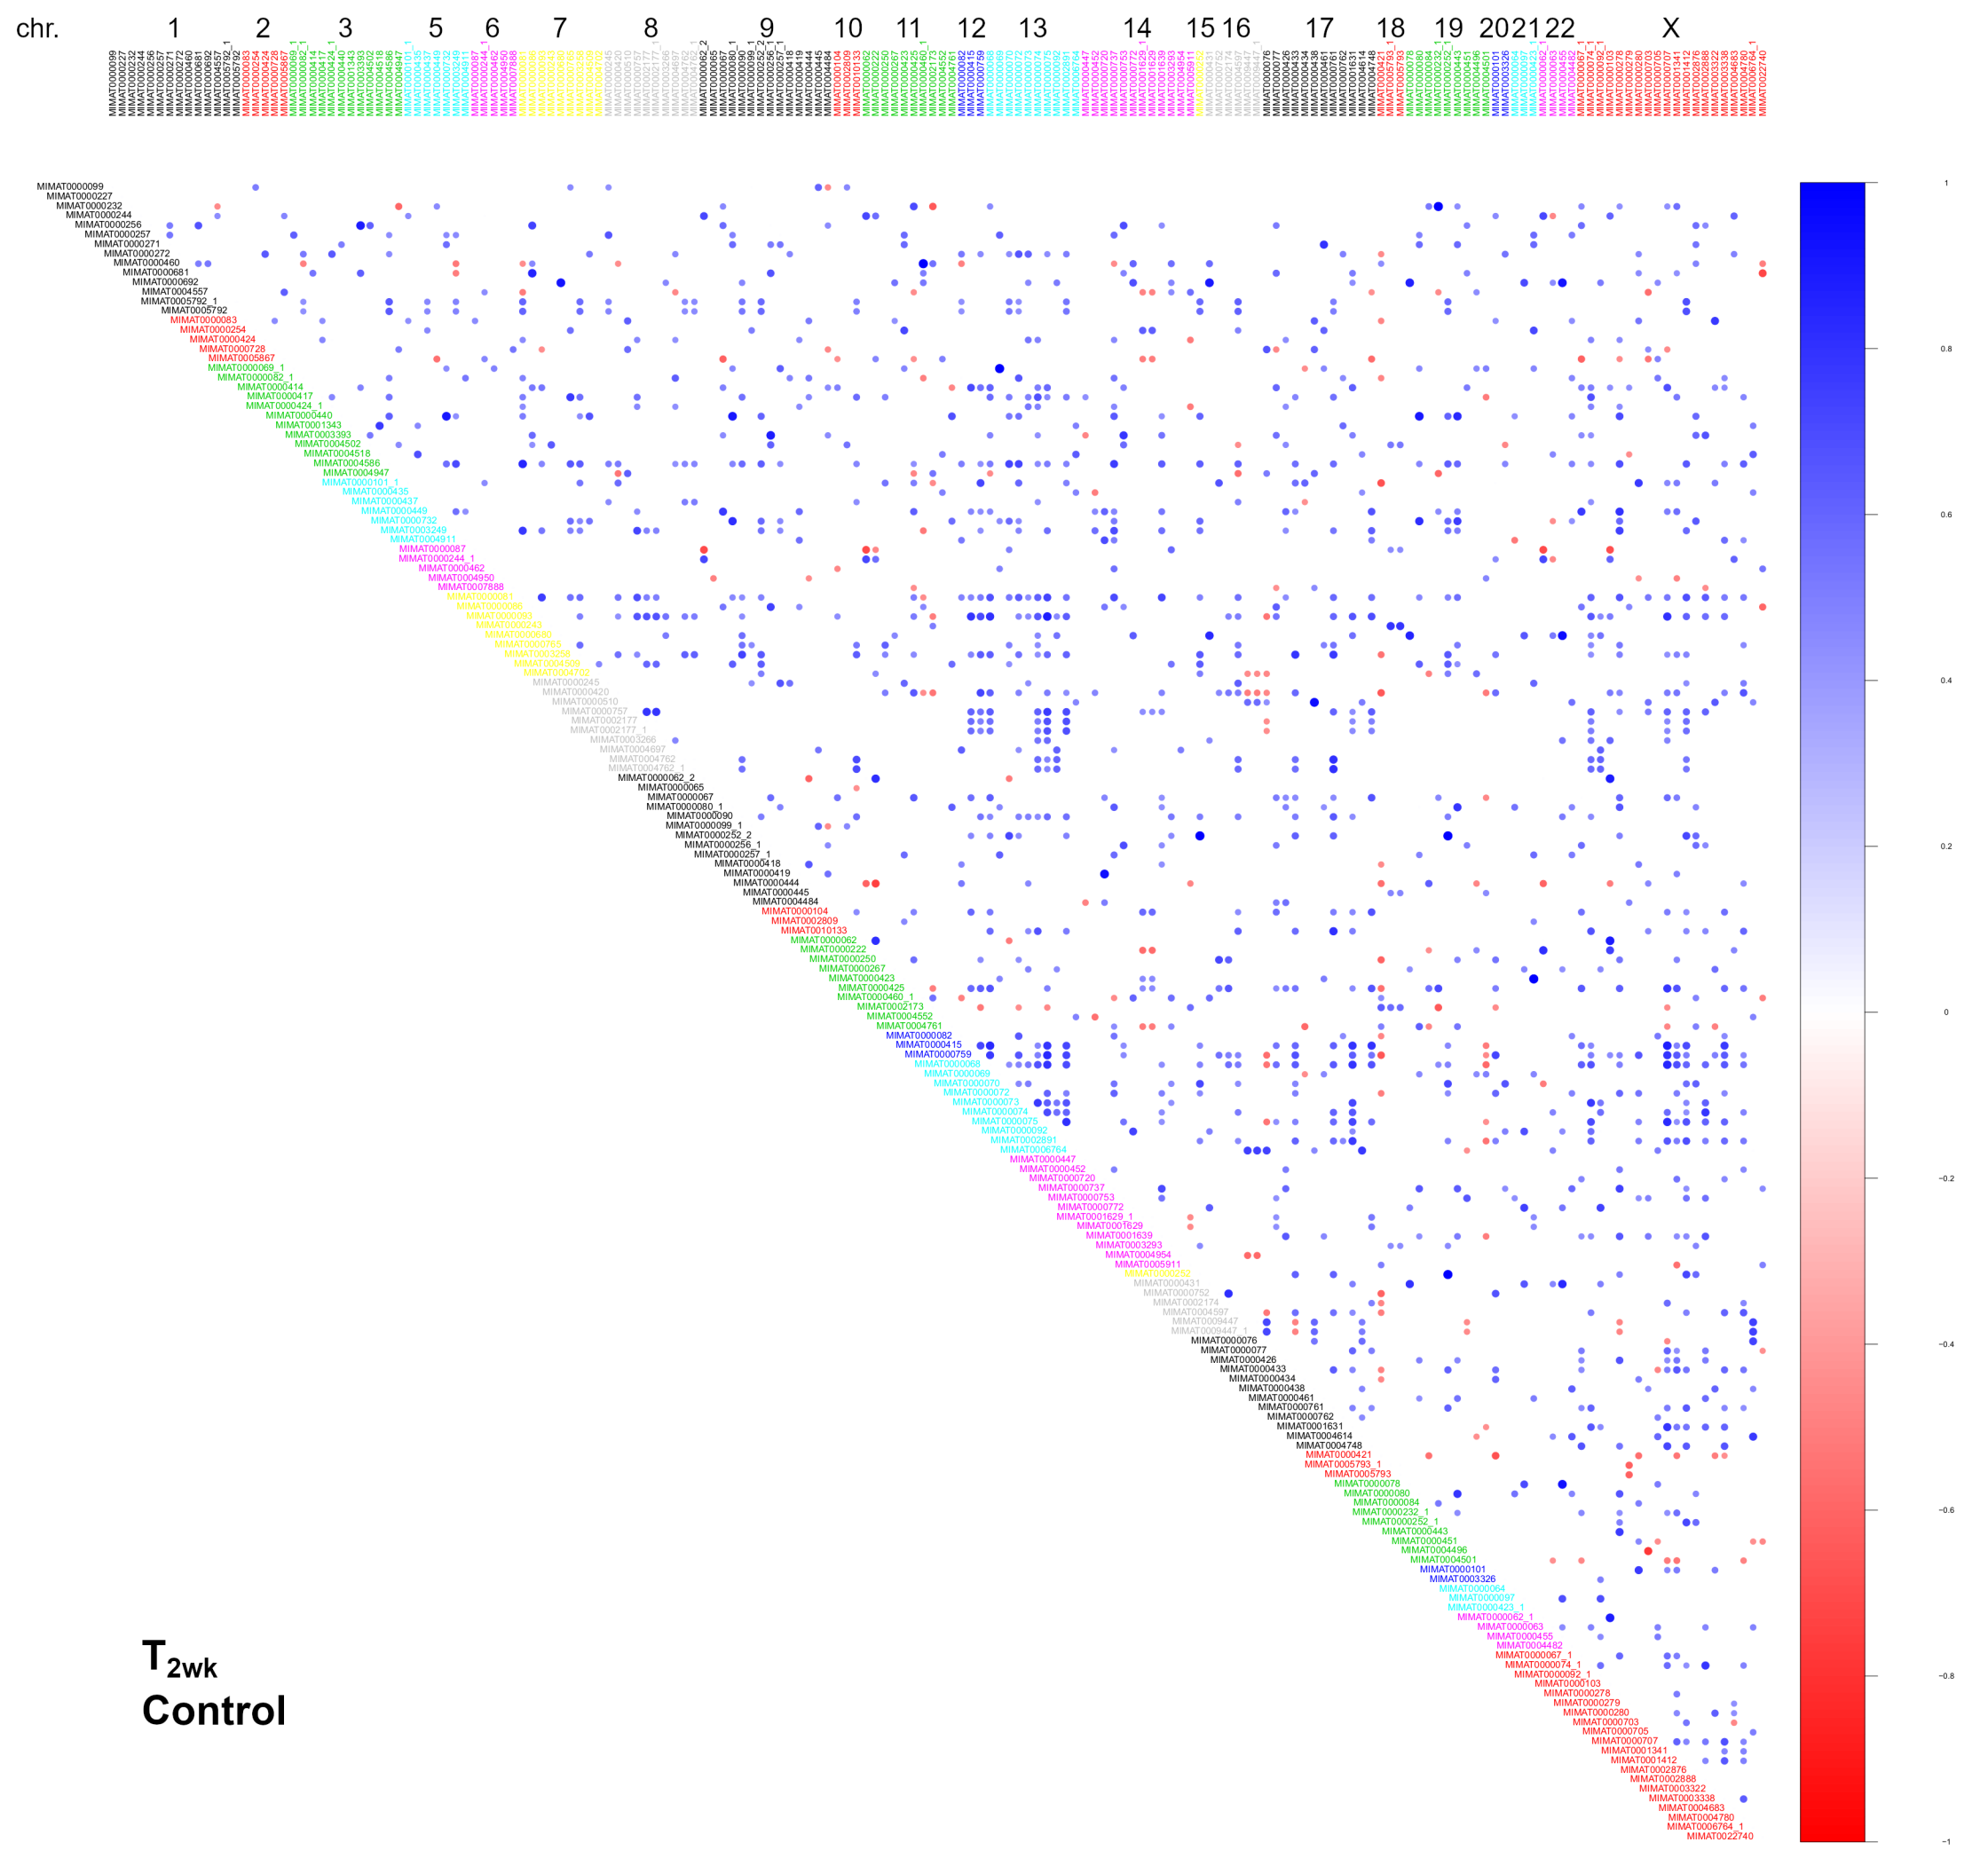

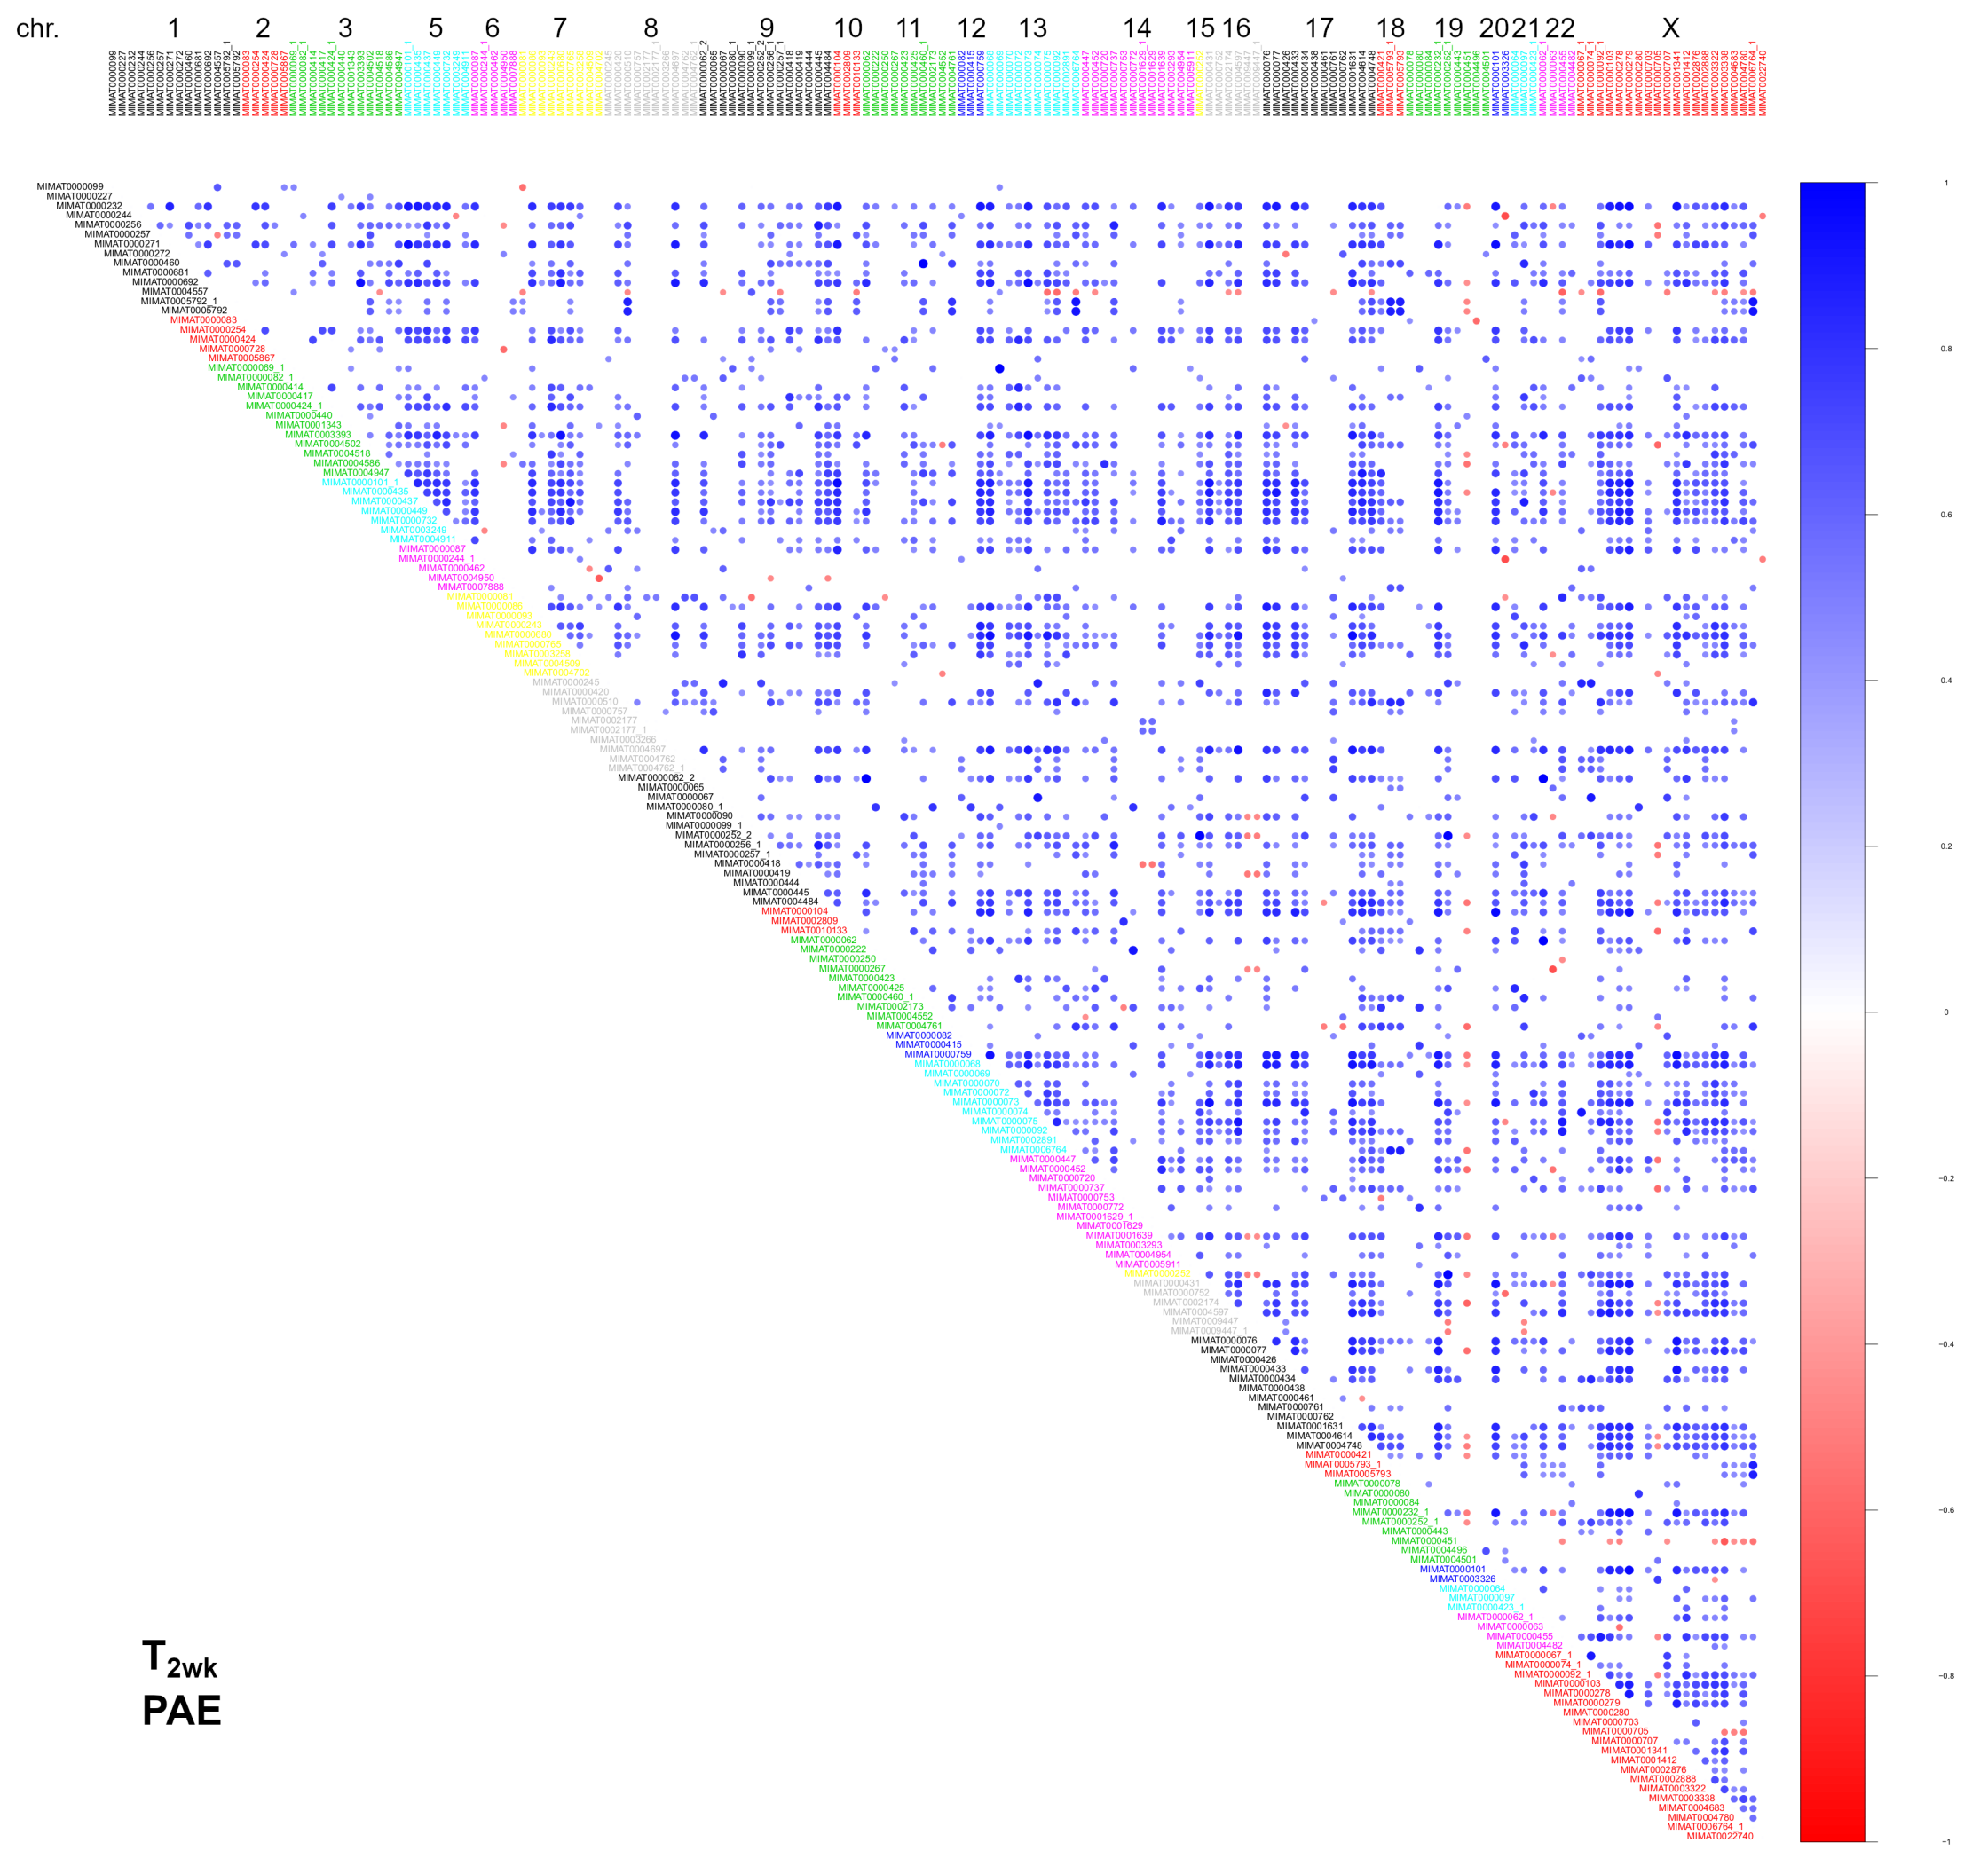

T<sub>2wk</sub>  
PAE



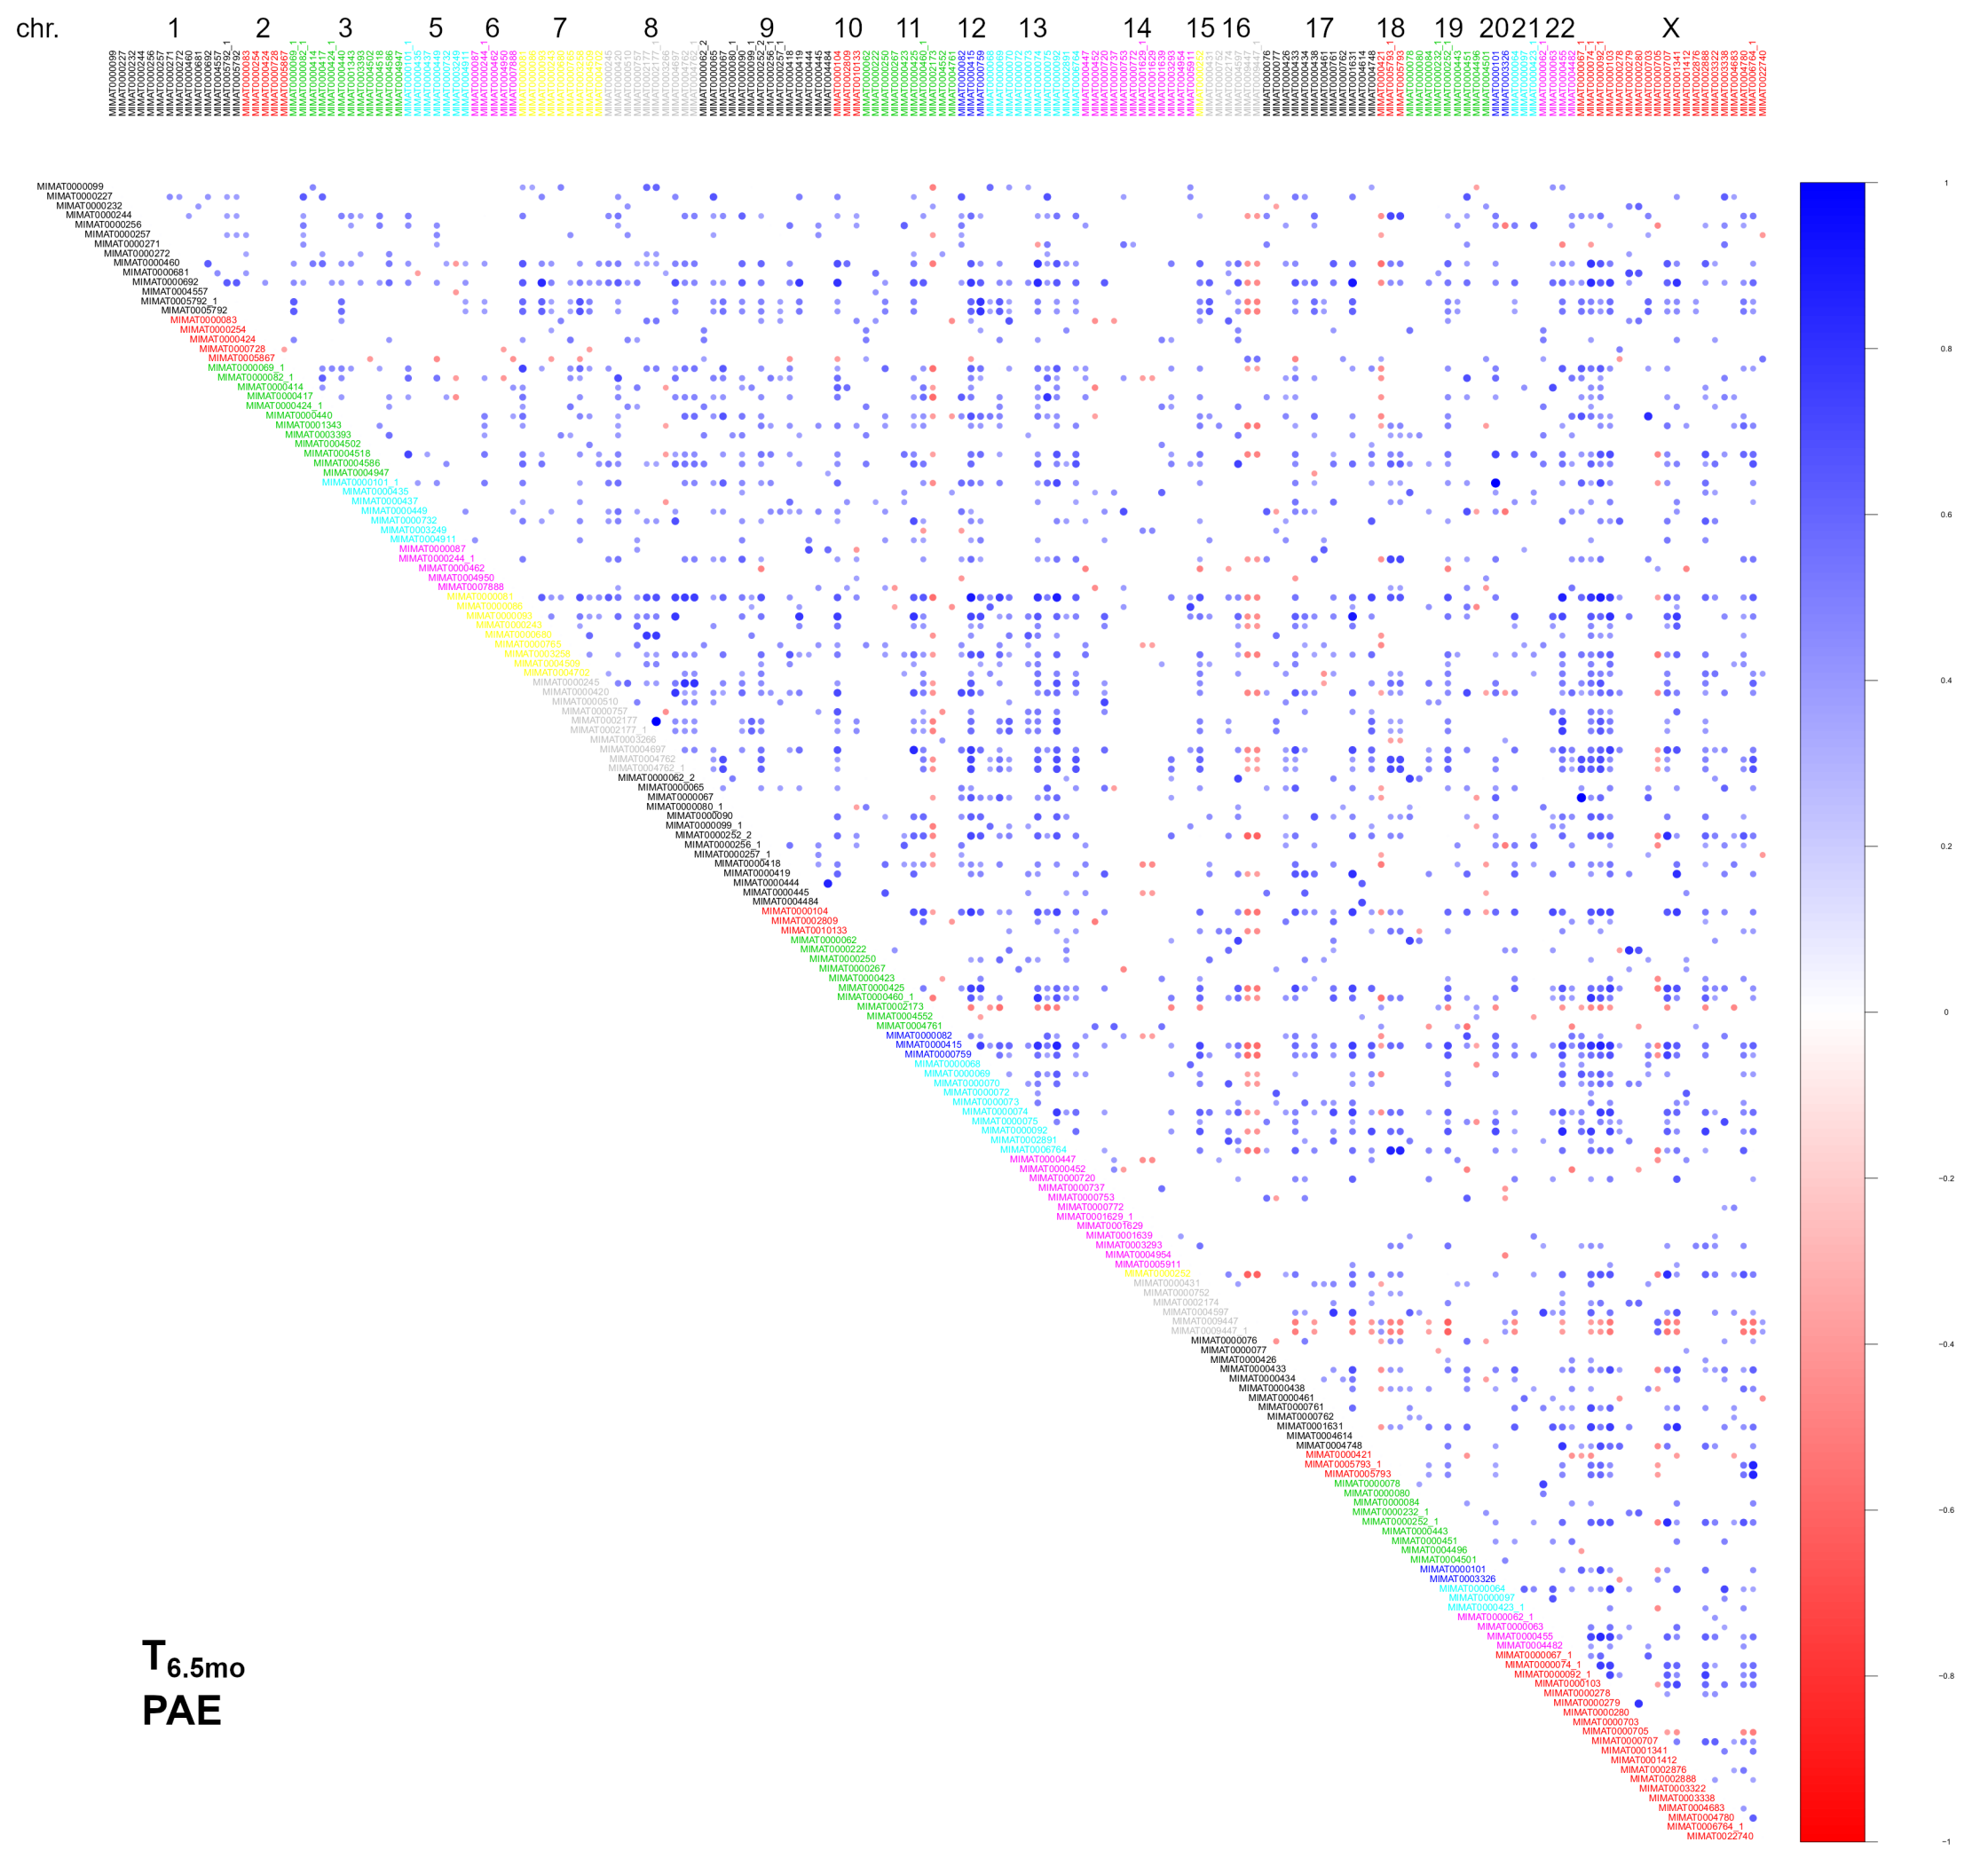

Supplement: 41598_2020_80734_MOESM3_ESM.pdf [file 41598_2020_80734_MOESM3_ESM.pdf]
