# Supplementary material for: Infant circulating MicroRNAs as biomarkers of effect in fetal alcohol spectrum disorders
Source: PubMed Central journal article supplement (PMC7809131; doi:10.1038/s41598-020-80734-y), 2021-01-14
Supplement: 41598_2020_80734_MOESM7_ESM.pdf [file 41598_2020_80734_MOESM7_ESM.pdf]

t6\_factors

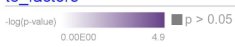

T<sub>6.5mo</sub>

Canonical Pathways  
Fisher's Exact Test  
p < 0.05

Canonical Pathways

t6\_f1  
t6\_f3  
t6\_f2

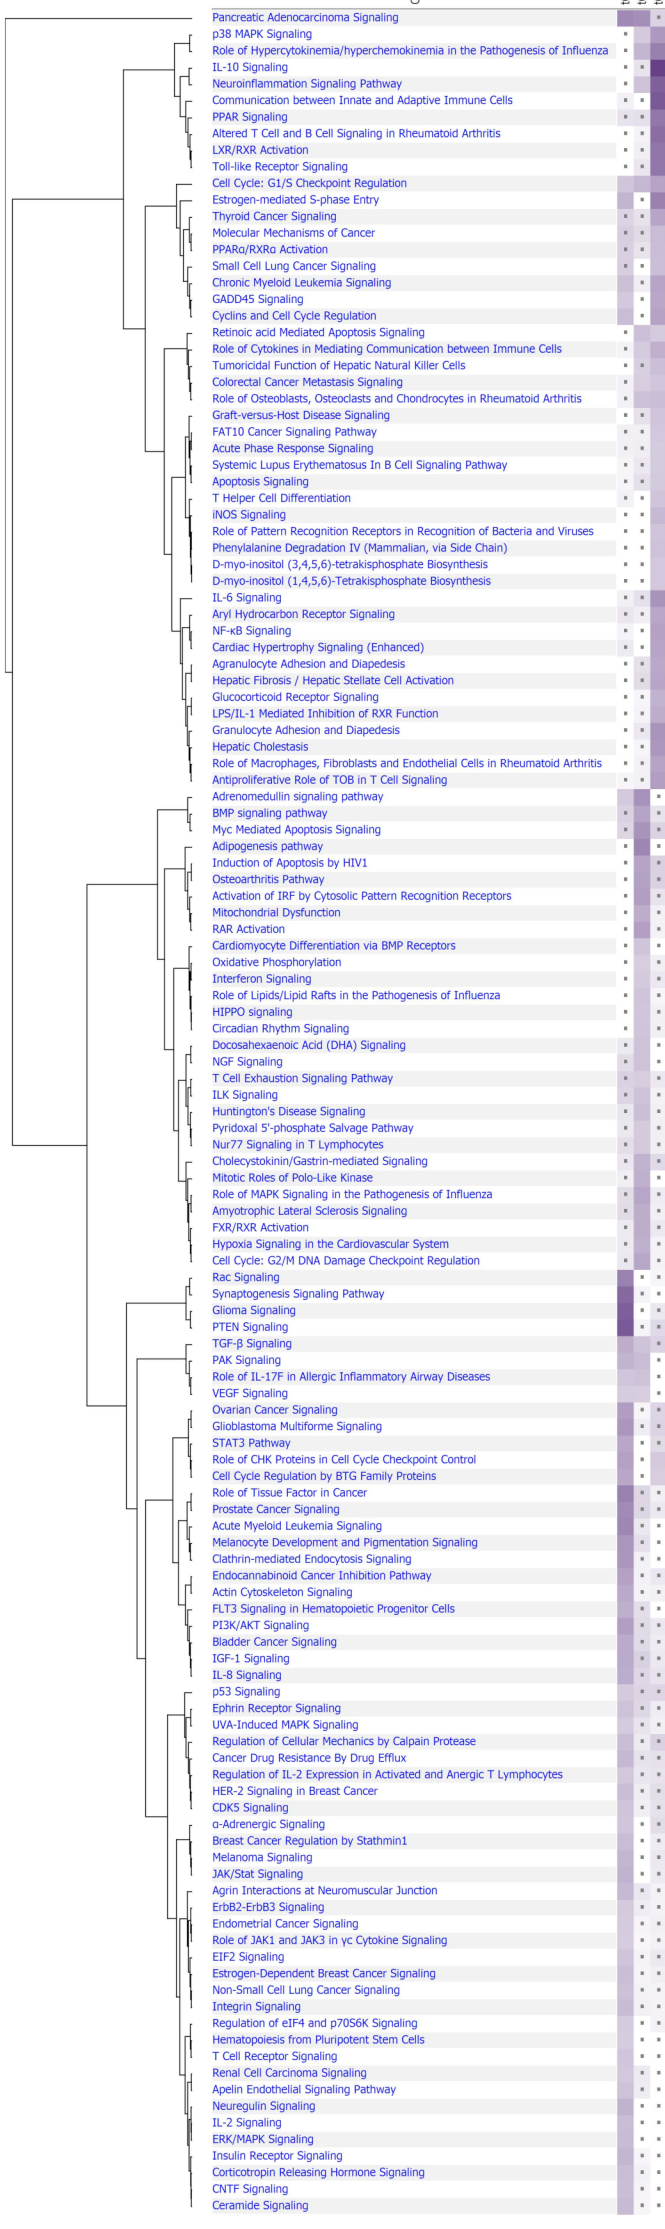

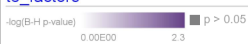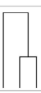

T<sub>6.5mo</sub>

Canonical Pathways  
Benjamini-Hochberg Corrected  
p < 0.05

Canonical Pathways

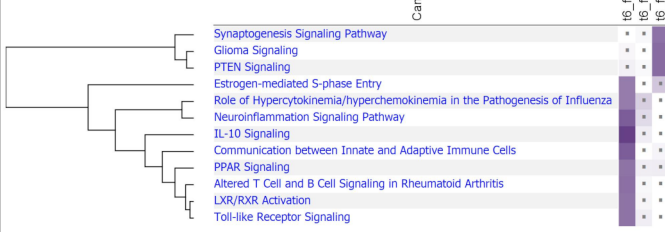

t6\_factors

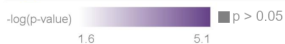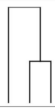

T<sub>6.5mo</sub>

Diseases & Bio Functions

Fisher's Exact Test

p < 0.001

Diseases and Bio...

t6\_12 t6\_13 t6\_11

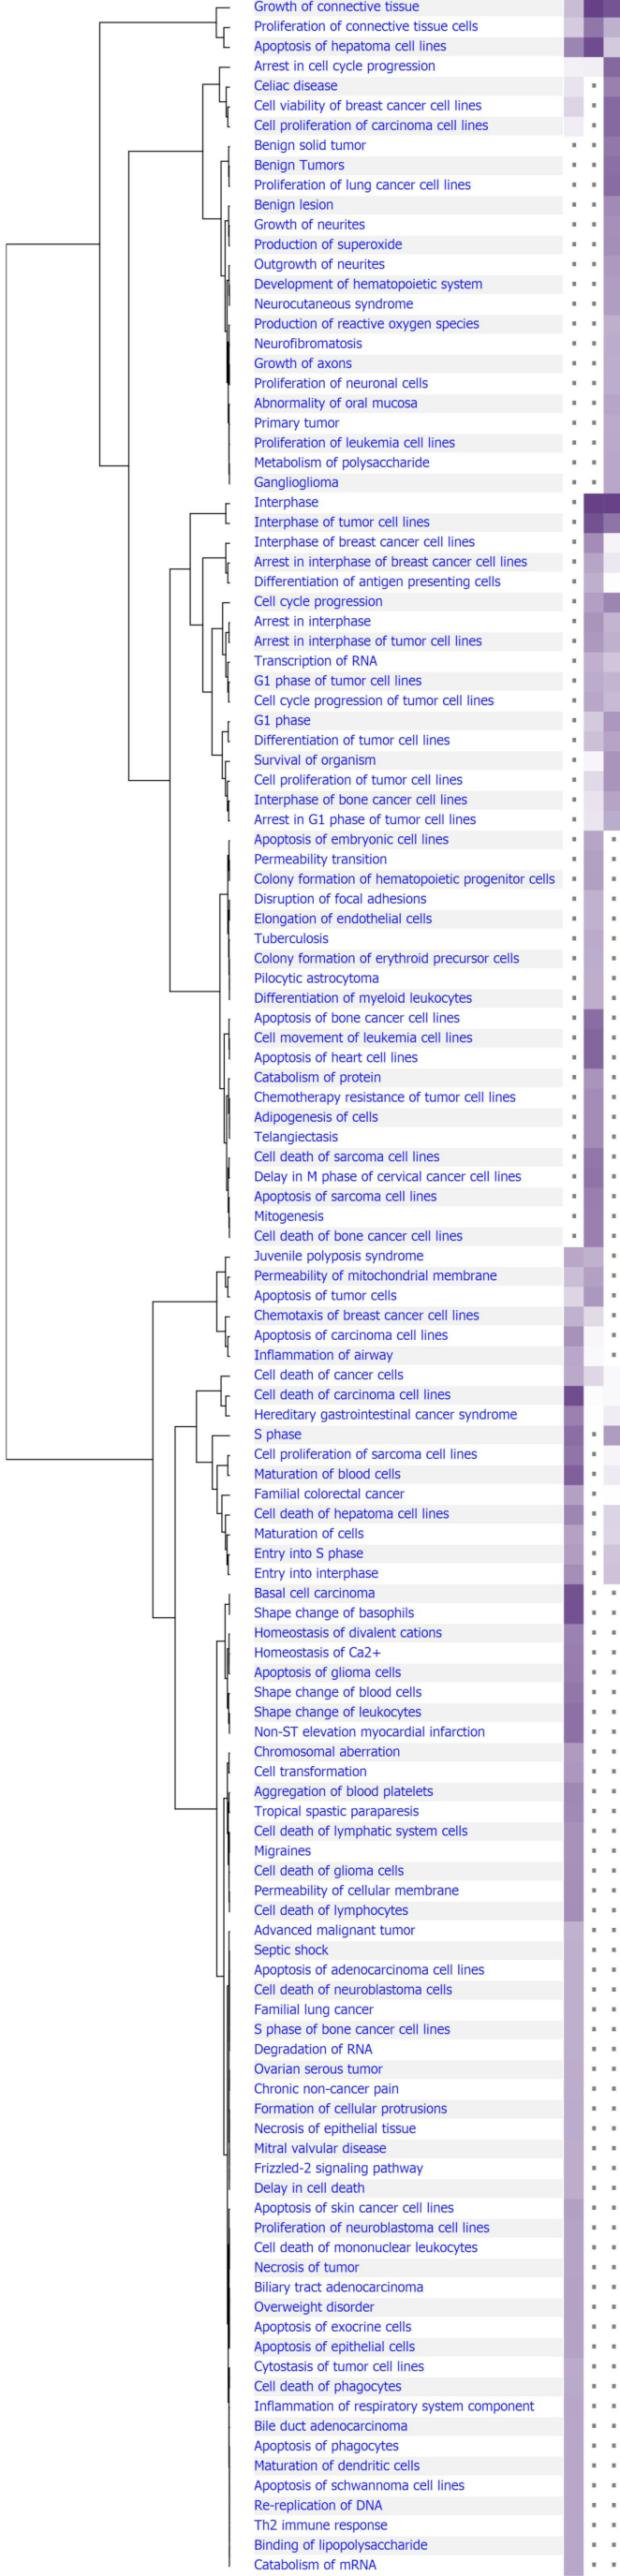

# t6\_factors

-log(B-H p-value) 0.3 1.5 ■ p > 0.05

T<sub>6.5mo</sub>

Diseases & Bio Functions

Benjamini-Hochberg Corrected

p < 0.05

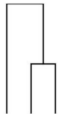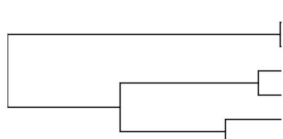

Diseases and Bio...

|                                      | t6_f2 | t6_f3 | t6_f1 |
|--------------------------------------|-------|-------|-------|
| Cell movement of leukemia cell lines | ■     | ■     | ■     |
| Apoptosis of heart cell lines        | ■     | ■     | ■     |
| Interphase                           | ■     | ■     | ■     |
| Interphase of tumor cell lines       | ■     | ■     | ■     |
| Apoptosis of hepatoma cell lines     | ■     | ■     | ■     |
| Growth of connective tissue          | ■     | ■     | ■     |
