# Supplementary material for: Infant circulating MicroRNAs as biomarkers of effect in fetal alcohol spectrum disorders
Source: PubMed Central journal article supplement (PMC7809131; doi:10.1038/s41598-020-80734-y), 2021-01-14
Supplement: 41598_2020_80734_MOESM10_ESM.pdf [file 41598_2020_80734_MOESM10_ESM.pdf]

## 1 **Supplementary Methods S10**

### 2 **Omega Adjustment for Collinearity in the Residuals**

3 The formula for Omega with correlated residuals was adjusted as per recommendations  
4 of (1) and is shown below:

$$5 \quad \Omega = \frac{(\sum \lambda_i)^2}{(\sum \lambda_i)^2 + \sum \text{Var}(\varepsilon_i) + 2 \sum_i \sum_j \text{Cov}(\varepsilon_i, \varepsilon_j)} \quad (\text{Equation 2b})$$

6 With the term  $2 \sum_i \sum_j \text{Cov}(\varepsilon_i, \varepsilon_j)$  being two times the sum of the covariance between the error  
7 terms.

### 8 **Fit Indices and Corrective Statistics for Sample Size per CFA Model**

9 A number of additional fit indices along with corrected statistics as per Bartlett, Yuan  
10 and Swain were implemented to further enrich the findings of the CFA models. An R  
11 function was developed for that purpose. The findings are shown in the supplemental  
12 figures showing the magnitude of the fit indices in relation to what constitutes  
13 acceptable model fit (e.g., fit indices  $>.90$ , RMSE  $<.05$ , Chi-square/D.F.  $<2$ , etc.).

### 14 **Enrichment of pathway targeting for additional factor miRNAs**

15 Following IPA analysis of the factor loaded miRNAs, we examined additional miRNAs  
16 with an effect size  $> 0.35$  to determine if there was a biological basis for the inclusion of  
17 additional miRNAs in the factors. Using the results from the IPA, we identified the  
18 unique, discriminating biological pathways which contained mRNAs targeted by the  
19 miRNAs in each factor. We then assessed each of the candidate additional miRNAs for  
20 enriched targeting of these discriminating pathways. An enrichment score was created  
21 by quantifying the number of times each candidate miRNA targeted mRNAs within the  
22 discriminating factor pathways divided by the number of times mRNAs in those  
23 pathways were targeted by all the miRNAs. miRNAs which showed enrichment for

24 targeting unique factor pathways were then added into the original factors if they  
25 improved the model fit.

## 26 **Bootstrap resampling method**

27 To test the stability of the pairwise correlations with  $p$ -values less than 0.05, we used a  
28 bootstrap method (2-4) and resampled each of the groups (PAE and controls) by  
29 replacement to generate a new resampled group with sample size equal to the original  
30 group. We then generated a  $p$ -value matrix for the resampled groups and determined  
31 the number of significant  $p$ -values. The resampling method was repeated for 2000  
32 iterations for each of the groups. Confidence intervals for the difference between the  
33 mean number of significant  $p$ -values in the control and PAE groups were generated as  
34 well as the standard deviation of the distribution. Bootstrap resampling with  
35 replacement, with 2000 iterations, was also used to assess potential sex differences in  
36 *ex*miRNA expression. *ex*miRNAs were quantified as “likely sex-specific” if they were  
37 significant in at least 50% of the resampling analyses (proportion >0.5) and were  
38 significantly altered more frequently in one infant sex than the population as a whole.

## 39 **R Code for Correlation Plots and Bootstrap analysis**

40 `capetown_knitr.R`

```
41 #read the data tables  
42 merged_t0_ctrl <- read.csv("C:/Users/nihal/Desktop/Cape_town_R_scripts  
43 /merged_t0_ctrl.csv")  
44 merged_t0_eth <- read.csv("C:/Users/nihal/Desktop/Cape_town_R_scripts/  
45 merged_t0_eth.csv")  
46 merged_t6_ctrl <- read.csv("C:/Users/nihal/Desktop/Cape_town_R_scripts  
47 /merged_t6_ctrl.csv")  
48 merged_t6_eth <- read.csv("C:/Users/nihal/Desktop/Cape_town_R_scripts/  
49 merged_t6_eth.csv")  
50 mimat_loc_t0 <- read.csv("C:/Users/nihal/Desktop/Cape_town_R_scripts/t
```

```

51 0_miRNA_location.csv")
52 mimat_loc_t6<- read.csv("C:/Users/nihal/Desktop/Cape_town_R_scripts/t6
53 _miRNA_location.csv")
54 #subset the data to have the 148 miRNA columns only
55 cor_miR_t0_ctrl<-merged_t0_ctrl[,-c(1,150:159)]
56 cor_miR_t0_eth<-merged_t0_eth[,-c(1,150:159)]
57 cor_miR_t6_ctrl<-merged_t6_ctrl[,-c(1:2,151:160)]
58 cor_miR_t6_eth<-merged_t6_eth[,-c(1:2,151:160)]
59 #example of the head of the tables (the first 6 columns only for the w
60 idth of the document)
61 head(cor_miR_t0_ctrl[,1:6])

62 ## MIMAT0000252_t0 MIMAT0000752_t0 MIMAT0000435_t0 MIMAT0000431_t0 M
63 IMAT0000267_t0 MIMAT0000460_t0
64 ## 1 4.5181 10.4978 1.9758 0.1056
65 6.8282 0.7856
66 ## 2 3.2249 1.8634 0.6327 9.2682
67 7.9745 2.9407
68 ## 3 3.1290 0.8669 0.8505 0.9307
69 7.6617 1.0695
70 ## 4 6.4971 2.7475 0.9660 1.5122
71 7.6501 1.4382
72 ## 5 3.6535 2.3416 2.0921 2.3006
73 0.5507 1.4123
74 ## 6 2.2661 1.9001 3.2532 2.3976
75 7.2232 1.0592

76 #use the corrplot library for generating the plots
77 library(corrplot)
78 #function to genrate a matrix of p values for the correlation
79 cor.mtest <- function(mat, ...) {
80 mat <- as.matrix(mat)
81 n <- ncol(mat)
82 p.mat<- matrix(NA, n, n)
83 diag(p.mat) <- 0
84 for (i in 1:(n - 1)) {
85 for (j in (i + 1):n) {
86 tmp <- cor.test(mat[, i], mat[, j], ...)
87 p.mat[i, j] <- p.mat[j, i] <- tmp$p.value
88 }
89 }
90 colnames(p.mat) <- rownames(p.mat) <- colnames(mat)
91 p.mat
92 }
93 #generate the correlation matrices and p value matrices for each of th
94 e t0 and t6 ,control and ethanol data sets

```

```

95 M0_ctrl<-cor(cor_miR_t0_ctrl)
96 p.mat0_ctrl <- cor.mtest(cor_miR_t0_ctrl)
97 M0_eth<-cor(cor_miR_t0_eth)
98 p.mat0_eth <- cor.mtest(cor_miR_t0_eth)
99 M6_ctrl<-cor(cor_miR_t6_ctrl)
100 p.mat6_ctrl <- cor.mtest(cor_miR_t6_ctrl)
101 M6_eth<-cor(cor_miR_t6_eth)
102 p.mat6_eth <- cor.mtest(cor_miR_t6_eth)
103 #generate the plots ,correlations with p values higher than 0.05 are m
104 asked (white), the miRNAs are ordered by heirarcheal clustering method
105 corrplot(M0_ctrl, type="upper", order="hclust",
106           p.mat = p.mat0_ctrl,addgrid.col=NA ,col=colorRampPalette(c("r
107 ed","white","blue"))(200), sig.level = 0.05,insig = "blank")
108 text(0,25,"ctrl_t0_hc_0.05")

109 corrplot(M0_eth, type="upper", order="hclust",
110           p.mat = p.mat0_eth ,col=colorRampPalette(c("red","white","blu
111 e"))(200),addgrid.col=NA, sig.level = 0.01,insig = "blank")
112 text(0,25,"eth_t0_hc_0.05")

113 corrplot(M6_ctrl, type="upper", order="hclust",
114           p.mat = p.mat6_ctrl,addgrid.col=NA ,col=colorRampPalette(c("r
115 ed","white","blue"))(200), sig.level = 0.05,insig = "blank")
116 text(0,25,"ctrl_t6_hc_0.05")

117 corrplot(M6_eth, type="upper", order="hclust",
118           p.mat = p.mat6_eth ,col=colorRampPalette(c("red","white","blu
119 e"))(200),addgrid.col=NA, sig.level = 0.05,insig = "blank")
120 text(0,25,"eth_t6_hc_0.05")

121 #now we need to generate correlation plots ordered by the chromosomal
122 location of the miRNAs,
123 #this was done by ordering the miRNAs by location in Excel sheet and i
124 mport the ordered miRNAs list
125 #order my data frame by this ordered list
126 #this is how the mimat loc table looks like
127 head(mimat_loc_t0[1:5])

128 ##      X      Mimat time.point .loc type.of.trans.
129 ## 1 146 MIMAT0004557         0    1      miRNA
130 ## 2  99 MIMAT0000692         0    1      miRNA
131 ## 3  42 MIMAT0000227         0    1      miRNA
132 ## 4  59 MIMAT0000271         0    1      miRNA
133 ## 5  54 MIMAT0000256         0    1      miRNA
134 ## 6  98 MIMAT0000681         0    1      miRNA

```

```

135 miR_t0_ctrl_ordered_loc<-cor_miR_t0_ctrl[,as.character(mimat_loc_t0$Va
136 riabables)]
137 miR_t0_eth_ordered_loc<-cor_miR_t0_eth[,as.character(mimat_loc_t0$Vari
138 ables)]
139 head(miR_t0_ctrl_ordered_loc[,1:6])

140 ## MIMAT0004557_t0 MIMAT0000692_t0 MIMAT0000227_t0 MIMAT0000271_t0 M
141 IMAT0000256_t0 MIMAT0000681_t0
142 ## 1 13.4187 -0.4159 2.9601 2.7811
143 0.4927 3.6452
144 ## 2 8.6539 8.8862 0.7172 2.2490
145 0.0365 2.7242
146 ## 3 4.6561 -0.3431 1.3366 1.7890
147 0.1961 2.3996
148 ## 4 10.9144 -0.0465 1.8632 2.5919
149 0.3997 1.5562
150 ## 5 3.5321 0.6047 1.2586 2.6532
151 1.0020 3.2530
152 ## 6 0.3721 0.5306 1.1325 3.0136
153 -0.1167 3.1200

154 #correlation amtrix for t0 ctrl and ethanol ordered by location
155 M0_ctrl_loc<-cor(miR_t0_ctrl_ordered_loc)
156 p.mat0_ctrl_loc <- cor.mtest(miR_t0_ctrl_ordered_loc)
157 #import the chromosome number list to use it to color the miRNA by chr
158 omosomal location
159 #substiute X with a number 50 (just to generate a color for it)
160 color_t0_scheme<-gsub("X", "50",mimat_loc_t0$.loc)
161 corrplot(M0_ctrl_loc, type="upper",
162 p.mat = p.mat0_ctrl_loc ,col=colorRampPalette(c("red", "white",
163 "blue"))(200),tl.col=color_t0_scheme,addgrid.col=NA, sig.level = 0.05
164 ,insig = "blank")#ethanol

165 M0_eth_loc<-cor(miR_t0_eth_ordered_loc)
166 p.mat0_eth_loc <- cor.mtest(miR_t0_eth_ordered_loc)
167 color_t0_scheme<-gsub("X", "50",mimat_loc_t0$.loc)
168 corrplot(M0_eth_loc, type="upper",
169 p.mat = p.mat0_eth_loc ,col=colorRampPalette(c("red", "white",
170 "blue"))(200),tl.col=color_t0_scheme,addgrid.col=NA, sig.level = 0.05,
171 insig = "blank")

172 ##location t 6
173 miR_t6_ctrl_ordered_loc<-cor_miR_t6_ctrl[,as.character(mimat_loc_t6$Va
174 riabables)]
175 miR_t6_eth_ordered_loc<-cor_miR_t6_eth[,as.character(mimat_loc_t6$Vari
176 ables)]
177 head(miR_t6_ctrl_ordered_loc[,1:6])

```

```

178 ## MIMAT0004557_t6 MIMAT0000692_t6 MIMAT0000227_t6 MIMAT0000271_t6 M
179 IMAT0000256_t6 MIMAT0000681_t6
180 ## 1 4.2643 -0.2922 1.5974 2.7194
181 2.5401 1.7337
182 ## 2 11.2952 0.9414 1.1273 2.4208
183 -1.1288 0.4227
184 ## 3 13.2387 -1.7551 1.5340 2.1855
185 0.3371 9.3907
186 ## 4 13.2172 -2.4298 1.6701 2.9012
187 -1.0201 0.5069
188 ## 5 2.4228 -1.5197 0.6041 1.5140
189 -1.8955 0.1729
190 ## 6 11.5225 -1.9411 1.6495 2.9199
191 10.7730 0.7495

192 #correlation amtrix for t6 ctrl and ethanol ordered by location
193 M6_ctrl_loc<-cor(miR_t6_ctrl_ordered_loc)
194 p.mat6_ctrl_loc <- cor.mtest(miR_t6_ctrl_ordered_loc)
195 color_t6_scheme<-gsub("X", "50",mimat_loc_t6$.loc)
196 corrplot(M6_ctrl_loc, type="upper",
197 p.mat = p.mat6_ctrl_loc ,col=colorRampPalette(c("red","white"
198 ,"blue"))(200),tl.col=color_t6_scheme,addgrid.col=NA, sig.level = 0.01
199 ,insig = "blank")

200 #ethanol
201 M6_eth_loc<-cor(miR_t6_eth_ordered_loc)
202 p.mat6_eth_loc <- cor.mtest(miR_t6_eth_ordered_loc)
203 color_t6_scheme<-gsub("X", "50",mimat_loc_t6$.loc)
204 corrplot(M6_eth_loc, type="upper",
205 p.mat = p.mat6_eth_loc ,col=colorRampPalette(c("red","white",
206 "blue"))(200),tl.col=color_t0_scheme,addgrid.col=NA, sig.level = 0.01,
207 insig = "blank")

208 #####
209 #the code for generating correlation matrices for miRNAs with effect s
210 izes more then 0.4
211 #read the table of miRNA with high effect sizes , ordered by location
212 and convert the variables column to character instead of factor and su
213 bset your intial data matrices
214 #to include only the high effect size miRNAs
215 t0_0_4_location <- read.csv("C:/Users/nihal/Desktop/Cape_town_R_script
216 s/t0_0.4_location.csv")
217 L<-as.character(t0_0_4_location$Variables)
218 #how the table looks like
219 head(t0_0_4_location)

```

```

220 ##           Variables .loc      start      end absolute.effect.size_t0
221 ## 1 MIMAT0005867_t0      2 133014543 133014564          0.4680125
222 ## 2 MIMAT0004911_t0      5 136983271 136983292          0.4749076
223 ## 3 MIMAT0000435_t0      5 148808541 148808561          0.4049864
224 ## 4 MIMAT0000437_t0      5 148810224 148810246          0.4808910
225 ## 5 MIMAT0000093_t0      7  99691438  99691460          0.5848045
226 ## 6 MIMAT0003266_t0      8  10892731  10892752          0.4202743

227 high_ctrl_t0<-(cor_miR_t0_ctrl[,L])
228 high_eth_t0<-cor_miR_t0_eth[,L]
229 #just changing the underscore to hyphen for readable plot
230 names(high_ctrl_t0) = sub("_","-",names(high_ctrl_t0))
231 names(high_eth_t0) = sub("_","-",names(high_eth_t0))
232 #generate correlation matrices and p value matrices for the subsetted
233 datasets
234 M_ctrl_t0_high<-cor(high_ctrl_t0)
235 p.mat.ctrl.t0.high<-cor.mtest(high_ctrl_t0)
236 M_eth_t0_high<-cor(high_eth_t0)
237 p.mat.eth.t0.high<-cor.mtest(high_eth_t0)
238 #color scheme for the ordered by location plots
239 color_t0_scheme_high<-gsub("X","20",t0_0_4_location$.loc)
240 #generate the plots
241 #ordered by heirarcheal clustering
242 #set the self-diagonal correlation to zero

243 M_ctrl_t0_high[which(M_ctrl_t0_high==1)]<-0
244 M_eth_t0_high[which(M_eth_t0_high==1)]<-0

245

246 corrplot(M_ctrl_t0_high, type="upper", order="hclust",
247          p.mat = p.mat.ctrl.t0.high,addgrid.col=NA,col=colorRampPalett
248 e(c("red","white","blue"))(200),tl.cex=0.8, sig.level = 0.05,insig = "
249 blank")
250 text(2,5,"ctrl_t0_high_hc_0.05")

251 corrplot(M_eth_t0_high, type="upper", order="hclust",
252          p.mat = p.mat.eth.t0.high,addgrid.col=NA,col=colorRampPalette
253 (c("red","white","blue"))(200), sig.level = 0.05,tl.cex=0.8,insig = "b
254 lank")
255 text(3,5,"eth_t0_high_hc_0.05")

256 #ordered by chromosomal location #note: the high effect size miRNA Lis
257 t was ordered bylocation and the main dataframe was subset using this
258 list so
259 #it is already ordered by location #deleting order="hclust" uses the o
260 riginal order from the dataframe

```

```

261 corrplot(M_ctrl_t0_high, type="upper",
262           p.mat = p.mat.ctrl.t0.high,addgrid.col=NA,tl.col=color_t0_sch
263 eme_high,col=colorRampPalette(c("red","white","blue"))(200),tl.cex=0.8
264 , sig.level = 0.05,insig = "blank")
265 text(2,5,"ctrl_t0_high_loc_0.05")

266 corrplot(M_eth_t0_high, type="upper",
267           p.mat = p.mat.eth.t0.high,addgrid.col=NA,tl.col=color_t0_sche
268 me_high,col=colorRampPalette(c("red","white","blue"))(200), sig.level
269 = 0.05,insig = "blank",tl.cex=0.8)
270 text(3,5,"eth_t0_high_loc_0.05")

271 #the same approach for t6
272 t6_0_4_location <- read.csv("C:/Users/nihal/Desktop/Cape_town_R_script
273 s/t6_0.4_location.csv")
274 L6<-as.character(t6_0_4_location$Variables)
275 high_ctrl_t6<-cor_miR_t6_ctrl[,L6]
276 high_eth_t6<-cor_miR_t6_eth[,L6]
277 names(high_ctrl_t6) = sub("_","-",names(high_ctrl_t6))
278 names(high_eth_t6) = sub("_","-",names(high_ctrl_t6))
279 color_t6_scheme_high<-gsub("X","20",t6_0_4_location$.loc)
280 head(high_ctrl_t6[,1:5])

281 ## MIMAT0000414-t6 MIMAT0000069-t6 MIMAT0000435-t6 MIMAT0000449-t6 M
282 IMAT0000101-t6
283 ## 1 -1.2730 -8.1441 2.9555 -0.8325
284 -1.8393
285 ## 2 -1.9767 -7.8664 0.4462 -1.0456
286 -1.7870
287 ## 3 -1.5055 -7.3059 -0.3621 -1.1795
288 -2.1211
289 ## 4 -2.6283 3.4625 0.7590 1.4032
290 -1.5331
291 ## 5 -2.9983 -8.4687 1.3157 -1.6338
292 -2.0600
293 ## 6 -2.1522 -8.1768 0.0706 -1.3111
294 -1.4434

295 M_ctrl_t6_high<-cor(high_ctrl_t6)
296 p.mat.ctrl.t6.high<-cor.mtest(high_ctrl_t6)
297 M_eth_t6_high<-cor(high_eth_t6)
298 p.mat.eth.t6.high<-cor.mtest(high_eth_t6)

299 M_ctrl_t6_high[which(M_ctrl_t6_high==1)]<-0
300 M_eth_t6_high[which(M_eth_t6_high==1)]<-0

```



```

301
302 corrplot(M_ctrl_t6_high, type="upper", order="hclust",
303           p.mat = p.mat.ctrl.t6.high,addgrid.col=NA,col=colorRampPalett
304 e(c("red","white","blue"))(200), sig.level = 0.05,insig = "blank",tl.c
305 ex=1.2)
306 text(2,5,"ctrl_t6_hc_high_0.05")

307 corrplot(M_ctrl_t6_high, type="upper",
308           p.mat = p.mat.ctrl.t6.high,addgrid.col=NA,tl.col=color_t6_sch
309 eme_high,col=colorRampPalette(c("red","white","blue"))(200),tl.cex=1.2
310 , sig.level = 0.05,insig = "blank")
311 text(2,5,"ctrl_t6_high_loc_0.05")

312 corrplot(M_eth_t6_high, type="upper", order="hclust",
313           p.mat = p.mat.eth.t6.high,addgrid.col=NA,col=colorRampPalette
314 (c("red","white","blue"))(200),tl.cex=1.2, sig.level = 0.05,insig = "b
315 lank")
316 text(2,5,"eth_t6_hc_high_0.05")

317 corrplot(M_eth_t6_high, type="upper",
318           p.mat = p.mat.eth.t6.high,addgrid.col=NA,tl.col=color_t6_sche
319 me_high,col=colorRampPalette(c("red","white","blue"))(200),tl.cex=1.2,
320 sig.level = 0.05,insig = "blank")
321 text(2,5,"eth_t6_loc_high_0.05")

322 ##Calculating the number of significant p values (less than 0.05) in e
323 ach of the groups (t0 control ,t0 ethanol,t6 control , t6 ethanol)
324 length(which(p.mat0_ctrl<0.05))

325 ## [1] 3066

326 length(which(p.mat0_eth<0.05))

327 ## [1] 6458

328 length(which(p.mat6_ctrl<0.05))

329 ## [1] 3592

330 length(which(p.mat6_eth<0.05))

331 ## [1] 4252

332 ## to test the stability of number of significant p values in each of
333 the four groups
334 #we applied bootstrap to simulate a population from the sample set we
335 have
336 #in each simulated sample we generated p values matrix and counted the
337 number of significant correlations

```

```

338 #after 2000 simulations , histogram was drawn and t test was conducted
339 between the two lists containing number of significant p values in eac
340 h
341 #simulated run
342 #for the purpose of generating this report , we are running the code f
343 or 50 iterations , however the reported data was from 2000 iterations
344 pmat_ctrl_0_boot_sig<-list()
345 pmat_eth_0_boot_sig<-list()
346 for(i in 1:50) {
347     row_C_0 <- sample(row(cor_miR_t0_ctrl),nrow(cor_miR_t0_ctrl), replac
348 e = TRUE)
349     c_0<-cor_miR_t0_ctrl[row_C_0,]
350     pmat_c_0<-cor.mtest(c_0)
351     pmat_ctrl_0_boot_sig[i]<-length(which(pmat_c_0<0.05))
352
353     row_E_0 <- sample(row(cor_miR_t0_eth),nrow(cor_miR_t0_eth), replace
354 = TRUE)
355     E_0<-cor_miR_t0_eth[row_E_0,]
356     pmat_E_0<-cor.mtest(E_0)
357     pmat_eth_0_boot_sig[i]<-length(which(pmat_E_0<0.05))
358
359 }
360 }
361 par(mfrow=c(3,1))
362 hist(unlist(pmat_ctrl_0_boot_sig),col="blue",xlim=c(2000,12000),breaks
363 =5,main="ctrl blue ,eth red, t0")
364 hist(unlist(pmat_eth_0_boot_sig),col="red",breaks=5,xlim=c(2000,12000)
365 )
366 hist(unlist(pmat_ctrl_0_boot_sig),col="blue",xlim=c(2000,12000),breaks
367 =5,main="ctrl blue ,eth red, t0")
368 hist(unlist(pmat_eth_0_boot_sig),col="red",breaks=5,add=TRUE)
369
370 t.test(unlist(pmat_ctrl_0_boot_sig),unlist(pmat_eth_0_boot_sig))
371
372 ##
373 ## Welch Two Sample t-test
374 ##
375 ## data:  unlist(pmat_ctrl_0_boot_sig) and unlist(pmat_eth_0_boot_sig)
376 ## t = -11.449, df = 91.495, p-value < 2.2e-16
377 ## alternative hypothesis: true difference in means is not equal to 0
378 ## 95 percent confidence interval:
379 ## -3442.412 -2424.548
380 ## sample estimates:
381 ## mean of x mean of y
382 ## 5299.60 8233.08

```

```

381 #t6
382 pmat_ctrl_6_boot_sig<-list()
383 pmat_eth_6_boot_sig<-list()
384 for(i in 1:50) {
385   row_C_6 <- sample(row(cor_miR_t6_ctrl),nrow(cor_miR_t6_ctrl), replac
386 e = TRUE)
387   c_6<-cor_miR_t6_ctrl[row_C_6,]
388   pmat_c_6<-cor.mtest(c_6)
389   pmat_ctrl_6_boot_sig[i]<-length(which(pmat_c_6<0.05))
390
391   row_E_6 <- sample(row(cor_miR_t6_eth),nrow(cor_miR_t6_eth), replace
392 = TRUE)
393   E_6<-cor_miR_t6_eth[row_E_6,]
394   pmat_E_6<-cor.mtest(E_6)
395   pmat_eth_6_boot_sig[i]<-length(which(pmat_E_6<0.05))
396
397
398 }
399 par(mfrow=c(3,1))
400 hist(unlist(pmat_ctrl_6_boot_sig),col="blue",xlim=c(2000,12000),breaks
401 =5,main="ctrl blue ,eth red, t6")
402 hist(unlist(pmat_eth_6_boot_sig),col="red",breaks=5,xlim=c(2000,12000)
403 )
404 hist(unlist(pmat_ctrl_6_boot_sig),col="blue",xlim=c(2000,12000),breaks
405 =5,main="ctrl blue ,eth red, t6")
406 hist(unlist(pmat_eth_6_boot_sig),col="red",breaks=5,add=TRUE)
407
408

```

409 **Supplemental References**

- 410 1. Wang J, Wang X. Structural Equation Modeling: Applications Using Mplus: John  
411 Wiley & Sons; 2012.
- 412 2. Efron B. Bootstrap Methods: Another Look at the Jackknife. Ann Statist. 1979;7(1):1-  
413 26.
- 414 3. Kohavi R. A study of cross-validation and bootstrap for accuracy estimation and  
415 model selection. Proceedings of the 14th international joint conference on Artificial  
416 intelligence - Volume 2; Montreal, Quebec, Canada. 1643047: Morgan Kaufmann Publishers  
417 Inc.; 1995. p. 1137-43.
- 418 4. Salem NA, Mahnke AH, Wells AB, Tseng AM, Yevtushok L, Zymak-Zakutnya N, et al.  
419 Association between fetal sex and maternal plasma microRNA responses to  
420 prenatal alcohol exposure: evidence from a birth-outcomes stratified cohort. Biol Sex  
421 Differ. 2020; *Accepted*.
- 422
